# Supplementary material for: Tobacco Waste Liquid-Based Organic Fertilizer Particle for Controlled-Release Fulvic Acid and Immobilization of Heavy Metals in Soil
Source: MDPI journal article supplement (doi:10.3390/nano12122056), 2022-06-15
Supplement: s1 [file s1]

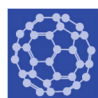

Supporting Information for:

# Tobacco Waste Liquid-Based Organic Fertilizer Particle for Controlled-Release Fulvic Acid and Immobilization of Heavy Metals in Soil

Dongfang Wang <sup>1</sup>, Jiangshan Li <sup>1</sup>, Xia Yao <sup>1</sup>, Qingchuan Wu <sup>2</sup>, Jing Zhang <sup>1</sup>, Jinghong Ye <sup>1</sup>, He Xu <sup>1</sup>, Zhengyan Wu <sup>2,3</sup> and Dongqing Cai <sup>1,\*</sup>

<sup>1</sup> College of Environmental Science and Engineering, Donghua University, Shanghai 201620, China; dfwang@dhu.edu.cn (D.W.); 2212069@mail.dhu.edu.cn (J.L.); yaoxia16@163.com (X.Y.); zhangjingzj23@163.com (J.Z.); 2191577@mail.dhu.edu.cn (J.Y.); hexu@dhu.edu.cn (H.X.)

<sup>2</sup> Key Laboratory of High Magnetic Field and Ion Beam Physical Biology, Hefei Institutes of Physical Science, Chinese Academy of Sciences, Hefei 230031, China; wu1221@mail.ustc.edu.cn (Q.W.); zywu@ipp.ac.cn (Z.W.)

<sup>3</sup> Key Laboratory of Environmental Toxicology and Pollution Control Technology of Anhui Province, Hefei Institutes of Physical Science, Chinese Academy of Sciences, Hefei 230031, China

\* Correspondence: dqcai@dhu.edu.cn

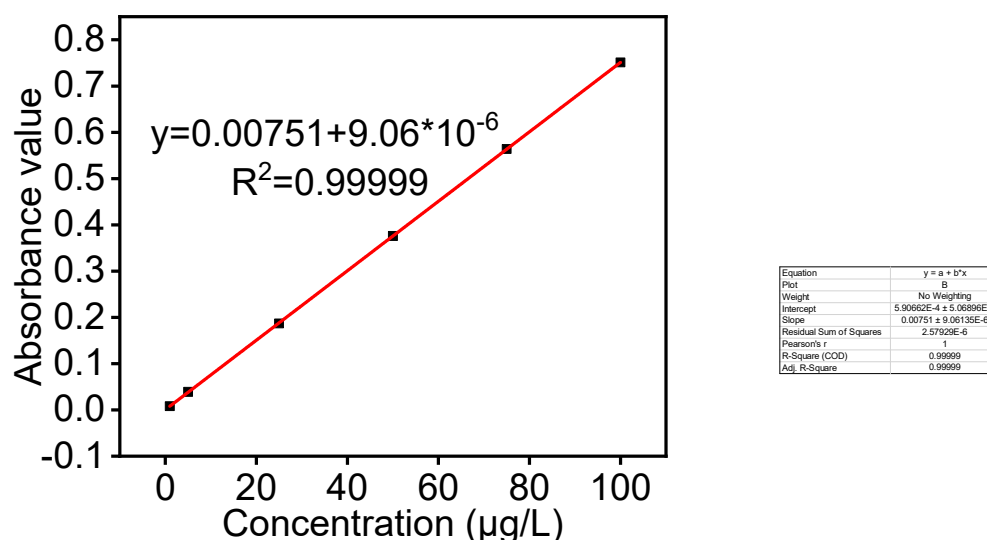

Figure S1. The relationship between FA and absorbance value.

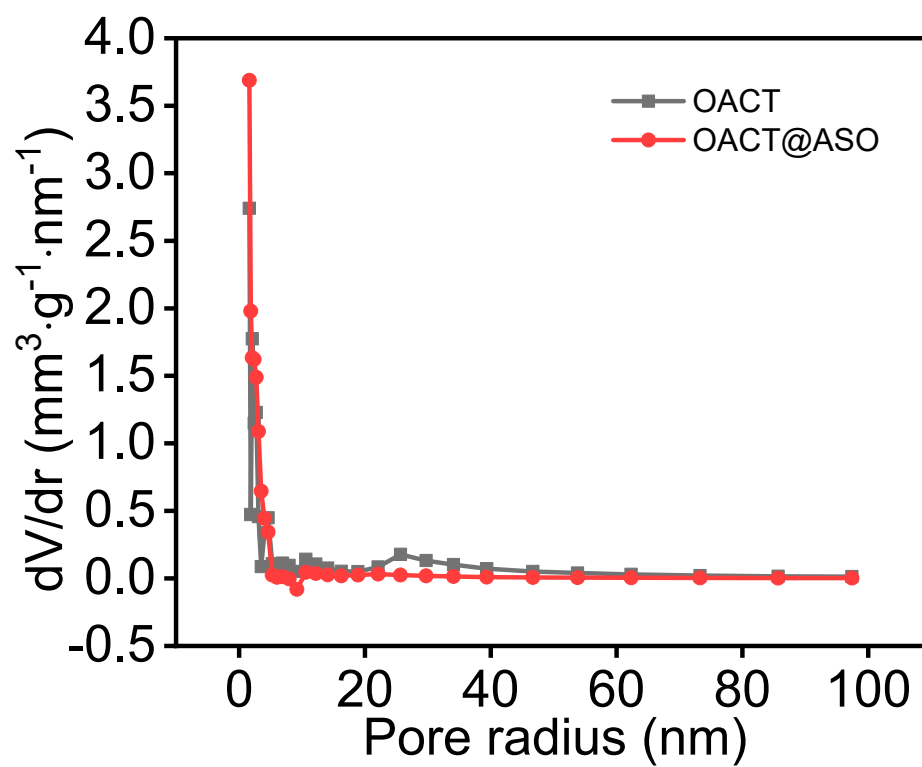

Figure S2. The pore size distributions of OACT and OACT@ASO.

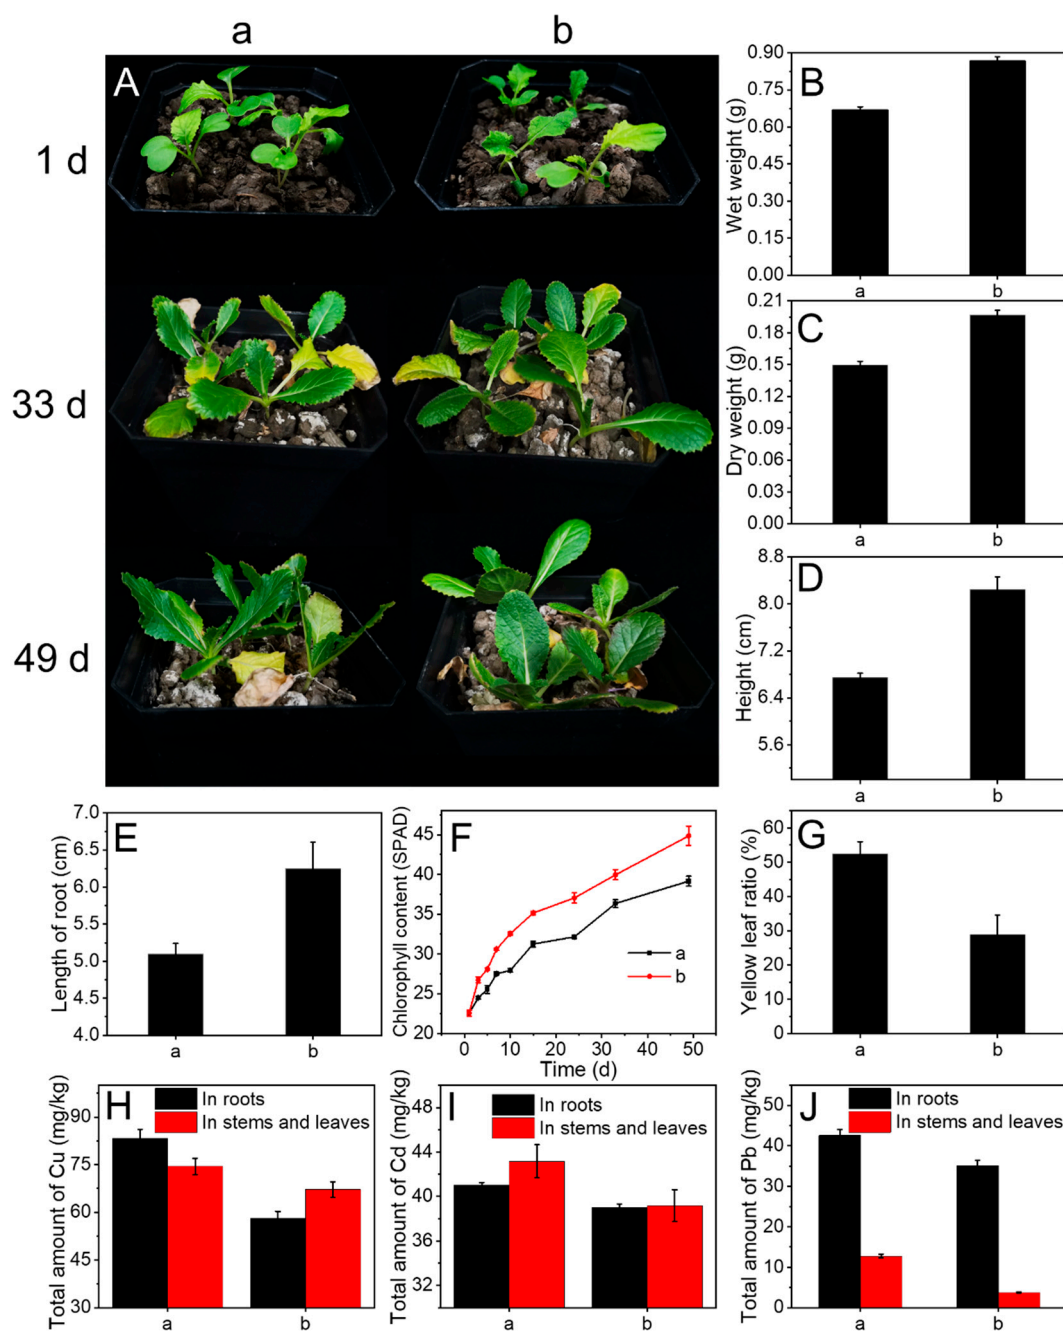

**Figure S3.** (A) Digital photographs of pakchoi seedlings in soil. (B–G) Wet weight, dry weight, height, length of root, chlorophyll content, and yellow leaf ratio of pakchoi seedlings. (H–J) Total amounts of Cu, Cd, and Pb in pakchoi seedlings roots, and stems and leaves: (a) Soil+Cu(II)/Cd(II)/Pb(II) mixed solution and (b) Soil+Cu(II)/Cd(II)/Pb(II) mixed solution+OACT@ASO.

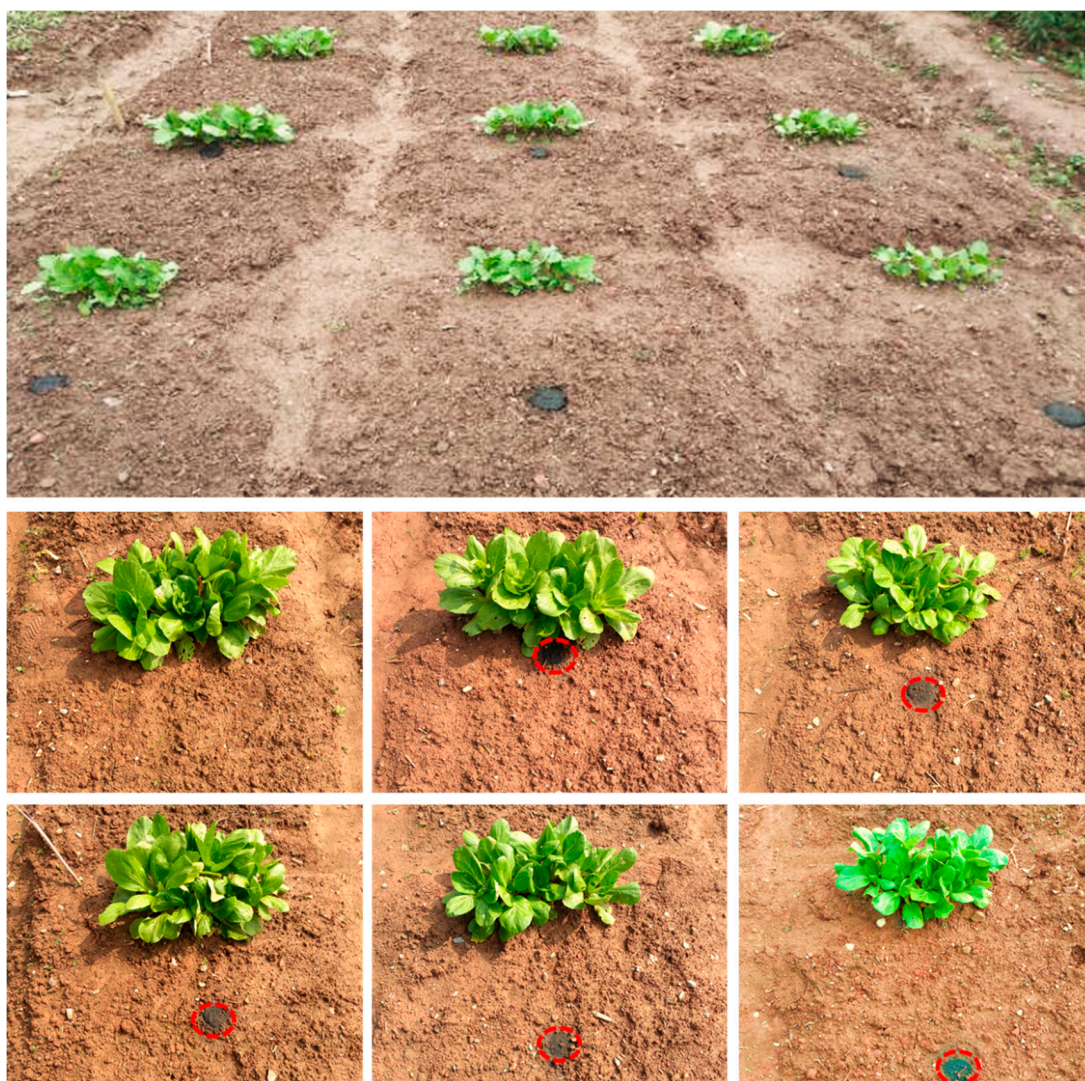

**Figure S4.** (A) Digital photographs of pakchoi at field.

**Table S1.** The composition analysis of tobacco waste liquid.

| No | Test Item                     | Test Results |                |             |
|----|-------------------------------|--------------|----------------|-------------|
|    |                               | Unit         | Test Method    | Test Result |
| 1  | density                       | g/mL         | NY/T 887-2010  | 1.19        |
| 2  | Cu                            | g/L          | NY/T 1974-2010 | <0.1        |
| 3  | Mo                            | g/L          | NY/T 1974-2010 | <0.1        |
| 4  | Mn                            | g/L          | NY/T 1974-2010 | <0.1        |
| 5  | P <sub>2</sub> O <sub>5</sub> | %            | NY/T 1977-2010 | 0.26        |
| 6  | S                             | %            | NY/T 1117-2010 | 0.35        |
| 7  | B                             | g/L          | NY/T 1974-2010 | <0.1        |
| 8  | Fe                            | g/L          | NY/T 1974-2010 | <0.1        |
| 9  | Mg                            | mg/kg        | NY/T 1117-2010 | 7.3         |
| 10 | Zn                            | g/L          | NY/T 1974-2010 | <0.1        |
| 11 | Insoluble Matter              | %            | NY/T 1973-2010 | 0.18        |
| 12 | Total Nitrogen                | %            | NY/T 1977-2010 | 0.99        |
| 13 | Ca                            | mg/kg        | NY/T 1117-2010 | 9.1         |
| 14 | pH                            | -            | NY/T 1973-2010 | 5.07        |
| 15 | Cl                            | %            | NY/T 1117-2010 | 2.24        |
| 16 | Organic Matter                | %            | NY 525-2012    | 27.7        |

---

|    |                  |   |                                       |      |
|----|------------------|---|---------------------------------------|------|
| 17 | K                | % | NY/T 1977-2010                        | 1.37 |
| 18 | Humic Acid       | % | NY/T 1971-2010                        | 2.37 |
| 19 | Fulvic Acid      | % | Ultraviolet-visible Spectrophotometer | 8.70 |
| 20 | Nicotine Content | % | JY/T 021-1996                         | 0.25 |

---
